PART OF A SPECIAL ISSUE ON ECOLOGY AND EVOLUTION OF PLANT REPRODUCTION

## Spatiotemporal variation in the pollination systems of a supergeneralist plant: is *Angelica sylvestris* (Apiaceae) locally adapted to its most effective pollinators?

Marcin Zych<sup>1,\*</sup>, Robert R. Junker<sup>2</sup>, Massimo Nepi<sup>3</sup>, Małgorzata Stpiczyńska<sup>1</sup>,  
Barbara Stolarska<sup>1</sup> and Katarzyna Roguz<sup>1</sup>

<sup>1</sup>Botanic Garden, Faculty of Biology, University of Warsaw, Aleje Ujazdowskie 4, 00-478 Warszawa, Poland, <sup>2</sup>Department of Biosciences, University of Salzburg, Hellbrunnerstrasse 34, 5020 Salzburg, Austria and <sup>3</sup>Department of Life Sciences, University of Siena, via Mattioli 4, 53 100 Siena, Italy

\*For correspondence. E-mail [mzych@biol.uw.edu.pl](mailto:mzych@biol.uw.edu.pl)

Received: 1 March 2018 Returned for revision: 2 May 2018 Editorial decision: 26 June 2018 Accepted: 28 June 2018  
Published electronically 28 July 2018

- **Background and Aims** In terms of pollination systems, umbellifers (plants of the carrot family, Apiaceae) are regarded as generalists, since their (usually dichogamous) flowers are visited by a wide range of insects representing several taxonomic orders. However, recent analyses of insect effectiveness revealed that these plants may be pollinated effectively by a narrow assemblage of insect visitors. Of particular interest was whether populations of an umbellifer species varied in pollinator assemblages and whether this could lead to local specialization of the pollination system. We also explored whether variation in pollinator assemblages was associated with variation in floral traits, and whether this variation influences reproductive output.
- **Methods** The focus was on *Angelica sylvestris*, a common European species visited by a taxonomically diverse insect assemblage. In three populations, located along an ~700-km transect, over three growth seasons insect visitors were identified, their effectiveness was assessed by surveying pollen loads present on the insect body, insect activity on umbels, nectar and scent composition was studied, and transplantation experiments were performed.
- **Key Results** The populations investigated in this study differed in their nectar and scent profiles and, despite the similar taxonomic composition of insect visitor assemblages, were effectively pollinated by disparate pollinator morphogroups, i.e. flies and beetles. Although this suggested local adaptations to the most effective pollinators, analyses of body pollen loads and behaviour on umbels demonstrated functional equivalency of the visitor morphogroups, which is probably related to the fact that *A. sylvestris* bears few ovules per flower. The transplantation experiments confirmed that reproductive success was not related to the source of experimental plants and that the insects do not exhibit preferences towards local genotypes.
- **Conclusions** *Angelica sylvestris* is morphologically well adapted to ecological generalization, and there is little evidence that the surveyed populations represent distinct pollination ecotypes. Most likely, the observed variation in floral characters can be interpreted as ‘adaptive wandering’. Specialization in this family seems possible only under very special circumstances, for example when the pollinator community comprises insect visitor groups that clearly differ in their pollination capacity (e.g. due to differences in their functional morphology) and/or have different perceptual biases (e.g. for colour or scent). However, the barrier to the evolution of morphological adaptations resulting in the fine-tuning of the flower towards particular pollinator types may arise from the architectural constraints on the floral bauplan that make umbellifers so uniform in their floral displays and so successful in attracting large numbers of pollinators.

**Key words:** Adaptive wandering, cantharophily, floral scent, generalization, myophily, nectar amino acids, phenotype, specialization, umbel.

### INTRODUCTION

Pollination by animals (zoogamy) prevails amongst angiosperms (Willmer, 2011), and it has long been proposed that this process is an important driver of angiosperm evolution (Grant, 1949; Van der Niet and Johnson, 2012; Van der Niet *et al.*, 2014a; Brosi, 2016).

Entomophilous plants vary from specialists having a single or a small number of pollinators, and derived from a very narrow taxonomic group, to supergeneralists pollinated by a large number of taxonomically disparate species (Ollerton, 1996; Proctor *et al.*, 1996; Johnson and Steiner, 2000; Willmer, 2011). For

specialization to occur, it is necessary that the observed groups of insect visitors differ in their capacity to pollinate. This can be achieved by variations in the abundance (quantity component of pollination) and effectiveness on a flower (quality component of pollination), together with preferences towards, or mechanical compatibility with, some floral phenotypes. As a result, different pollinator groups are able to variously affect plant fitness (Gómez and Zamora, 2006). Therefore, specialization is unlikely when different pollen vectors play the same role as selective agents due to their functional equivalency (Gómez and Zamora, 1999; Zamora, 2000). Another

important argument against obligate specialization is based on the evidence that plant–pollinator interactions are highly variable across time and space, both qualitatively and quantitatively (Schemske and Horvitz, 1984; Herrera, 1988, 1989; Ollerton, 1996; Waser et al., 1996; Gómez and Zamora, 1999, 2006; Price et al., 2005; Cosacov et al., 2008; Artz et al., 2010; Castro et al., 2013). Therefore, some authors have suggested that generalist pollination actually predominates in nature (Jordano, 1987; Herrera, 1996; Waser et al., 1996; Reverté et al., 2016) (for a somehow different view, however, see e.g. Armbruster et al., 2000; Johnson and Steiner, 2000; Fenster et al., 2004; Willmer, 2011; Padyšáková et al., 2013; Bartoš et al., 2015). There are, however, caveats to this reasoning, since most data published on the evolution of pollination systems are based on studies of relatively specialized plants (at least phenotypically), whereas information concerning phenotypic generalists, i.e. plants with flowers easily accessible for a wide taxonomic array of visitors, is relatively scarce (Ollerton et al., 2007), which only provides a partial picture of the role of pollinators in the evolution of flowers. Furthermore, we generally lack information on spatial diversity of pollination systems, and co-evolutionary processes among plants and pollinators resulting in the macro-evolutionary diversity of angiosperms act at the population level (Armbruster, 1985; Thompson, 2005; Herrera et al., 2006; Johnson, 2006, 2010). In fact, there is increasing evidence for the evolution of pollination ecotypes adapted to local pollinator assemblages (Johnson, 2006; Perez-Barrales et al., 2007; Anderson et al., 2009; Armbruster and Muchhala, 2009; Gómez et al., 2009a, 2015; Johnson, 2010; Cosacov et al., 2014; Van der Niet et al., 2014b; Yamada et al., 2014). Therefore, as postulated by Thompson (2005), many plants that appear to be specialists at the population level may in fact be generalists at the species level. However, in contrast to specialist plant species, where differences in pollinator fauna are of a qualitative character, generalized pollination systems differ mostly in the relative abundances of various pollinators, and evolution of their pollination niches and drivers of floral divergence are largely unknown (Gómez et al., 2015, and references cited therein).

Despite the fact that long-term, across-population studies can improve our understanding of the diverse selective pressures that drive floral evolution in zoogamous angiosperms (Brody, 1997; Aigner, 2005; Herrera et al., 2006), most reports of intraspecific variation in pollination are again biased towards specialized pollination systems, and information concerning spatial and temporal variation in pollination is scarce for generalist plant species (Herrera, 2005; Gómez et al., 2009a, b; Kuppler et al., 2016).

One of the plant families often associated with generalist pollination systems is Apiaceae (Faegri and van der Pijl, 1966; Proctor et al., 1996; Corbet, 2006; Zych et al., 2007), a taxon characterized by a high degree of floral and inflorescence uniformity (Bell, 1971; Bell and Lindsey, 1978). Indeed, Olesen et al. (2007) estimated that several members of Apiaceae are amongst the top ten plant generalists, based on the number of insect taxa that visited their flowers. These plants included *Angelica sylvestris*, which was visited by at least 245 insect species occurring within the plant's geographical range (Ellis and Ellis-Adam, 1993). This general statement, however, may not necessarily be true for all members of the Apiaceae, since more

specialized plant–pollinator relationships have been described for other umbelliferous species (Lindsey, 1984; Zych, 2007; Niemirski and Zych, 2011; Cursach and Rita, 2012b; Zych et al., 2014). These relationships may result from variation in many subtle, pollination-related characters that, in certain cases lead to ‘cryptic specialization’ of pollination systems (Bell, 1971). Such characters include, for example, umbel density (Bell and Lindsey, 1978; Lindsey and Bell, 1985; Bisht et al., 2008) and sex ratio (Pickering and Hill, 2002), the degree of dichogamy (Cruden and Hermann-Parker, 1977; Webb, 1981; Schlessman and Barrie, 2004), nectar composition and secretion (Lindsey and Bell, 1985; Stpiczyńska et al., 2015) and floral scent profiles (Borg-Karlson et al., 1994; Tollsten et al., 1994; Tollsten and Øvstedal, 1994). However, to address the issue of (local) specialization of pollination systems in Apiaceae, a better sampling of spatial and/or temporal variation in the pollination of natural populations of this large and economically important family is necessary. Unfortunately, we are aware of only ten studies that address these questions (Lindsey and Bell, 1985; Kaye and Kirkland, 1994; Lamborn and Ollerton, 2000; Pérez-Bañón et al., 2007; Zych, 2007; Davila and Wardle, 2008; Danderson and Molano-Flores, 2010; Niemirski and Zych, 2011; Cursach and Rita, 2012a; Zych et al., 2014), only five of which concern both phenomena. The general picture that arises from the aforementioned studies is intriguing. For example, *Daucus carota* (Lamborn and Ollerton, 2000) and Australian *Trachymene incisa* (Davila and Wardle, 2008) exhibited great fluctuations in pollinator assemblages. This contrasts markedly with data obtained for the reputedly supergeneralist *A. sylvestris*, which is visited by numerous insect taxa, but pollinated only by a taxonomically relatively narrow group of muscoid and syrphid flies (Niemirski and Zych, 2011). Furthermore, the composition of the pollinator assemblage for *A. sylvestris*, like that of another umbellifer, namely *Heracleum sphondylium* (Zych, 2007), remained constant in subsequent years. Therefore, it would appear that, despite their superficial uniformity, umbellifers display a whole range of different pollination strategies, perhaps even including ‘cryptic specialization’ (Bell, 1971), with certain subtle floral features attracting (or repelling) particular visitors to the flower. More data, however, relating to both temporal and spatial variation in the pollination system, are required if we are to investigate this hypothesis. To this end, we undertook assessment of the spatiotemporal variation present in the generalist pollination system. For the above reasons, we selected *A. sylvestris* as a model plant for this study. This species has a broad distribution range (Cannon, 1968) and is among the very few European Apiaceae taxa that have been extensively studied for both their pollination and floral biology under local conditions (Knuth, 1898; Zych et al., 2007; Niemirski and Zych, 2011). Furthermore, in terms of its pollination system, this species is considered a ‘supergeneralist’ (Ellis and Ellis-Adam, 1993; Olesen et al., 2007), even though its key pollinators appear exclusively to be dipterans (Niemirski and Zych, 2011). Of particular interest were the questions of whether *A. sylvestris* populations varied in pollinator assemblages and whether this could lead to local specialization of the pollination system. We also explored whether variation in pollinator assemblages was associated with variation in floral traits, and whether this variation influences reproductive output.

## MATERIALS AND METHODS

*Angelica sylvestris*

*Angelica sylvestris* (wild angelica) is a common component of the European flora, is distributed almost throughout the whole of Europe, and is usually found in wetlands, damp meadows and shady places (Cannon, 1968). It is a member of a large genus comprising ~110 species (Mabberley, 2008). This herbaceous perennial produces cauline leaves arranged in a rosette, and erect flower stems up to over 2 m tall (Cannon, 1968). *Angelica sylvestris* reproduces by seeds, and to date no indication of vegetative reproduction has been reported. Small (~2–3 mm in diameter), open flowers are arranged in large multi-layered inflorescences termed compound umbels (Fig. 1). Petals are greenish-white to pale pink in colour, and flower symmetry is mostly actinomorphic, but the outer flowers, arranged in umbellets, may be weakly zygomorphic. The flowers are dichogamous, and plants generally exhibit strong protandry at the level of the individual flower, the inflorescence and the whole plant. However, in some individuals a short overlap in sexual phases is possible within any given umbel (Niemirski and Zych, 2011). Flowers are visited by insects for pollen and for nectar which, as in many other Apiaceae, is produced in both flower sexual phases by the swollen base of the style, a structure called the stylopodium. The nectar of *A. sylvestris* is hexose-rich and composed of sucrose, glucose and fructose, as well as a small amount of amino acids. Nectar sugar concentration is similar for both floral sexual phases, but nectar production is male-biased, being >3-fold greater than in female-phase flowers (Stpiczyńska et al., 2015). This, however, does not appear to result in discrimination against the pistillate phase by insect visitors (Niemirski and Zych, 2011), a phenomenon that has been recorded for certain other Apiaceae species (Schlessman et al., 2004; Davila and Wardle, 2007; Zych, 2007). In terms of its pollination system *A. sylvestris* is regarded a supergeneralist (Olesen et al., 2007) since its umbels are visited by a wide range of insects representing several taxonomic orders (Ellis and Ellis-Adam, 1993; Zych et al., 2007; Niemirski and Zych, 2011). Although these flowers have no morphological adaptations that would restrict the access of insect visitors to floral rewards, recent analysis of

insect effectiveness revealed that in north-east Poland they are chiefly pollinated by a narrow assemblage of muscid and syrphid flies (Niemirski and Zych, 2011).

*Study populations*

In each of three years (2011–13) we conducted field observations and insect sampling for three Central European *A. sylvestris* populations located along an ~700-km south-west/north-east transect: (1) Milicz, Lower Silesia region, south-west Poland, 51°30'36" N, 17°18'23" E, 132 m a.s.l., hereafter referred to as the SW population; (2) Kleczkowo, Mazovia region, north-east Poland, 53°02'33" N, 21°51'37" E, 106 m a.s.l., hereafter referred to as the central (C) population [the same population was studied earlier by Zych and co-workers (Zych et al., 2007; Niemirski and Zych, 2011)]; and (3) Šiauliai, Šiauliai region, north Lithuania, 55°47'52" N, 23°18'27" E, 73 m a.s.l., hereafter referred to as the NE population. All three populations grew in similar wet meadow ecosystems within a mosaic of open and forest landscapes.

*Insect visitors to natural populations*

Field observations of insects were completed during July and August in 2011–13, which is the peak flowering time for *A. sylvestris* in these regions. For insect observations and sampling, a method slightly modified from that described by Niemirski and Zych (2011) was employed. In 2011, for each population we completed 12 rounds of observations of both umbel sexual phases (six for female-phase umbels and six for male-phase umbels), and during 2012–13 we completed 24 rounds annually (12 for female-phase umbels and 12 for male-phase umbels). Each round consisted of three phases: random selection of umbels; video recording (15 min, using an HDRXR106 digital camera; Sony, Japan); and insect sampling (15 min, using an entomological net or directly into plastic vials), totalling 90 h of observations and insect sampling over 3 years. Once selected, umbels were not excluded from the subsequent round, and therefore it is possible that the same umbel was observed more than once.

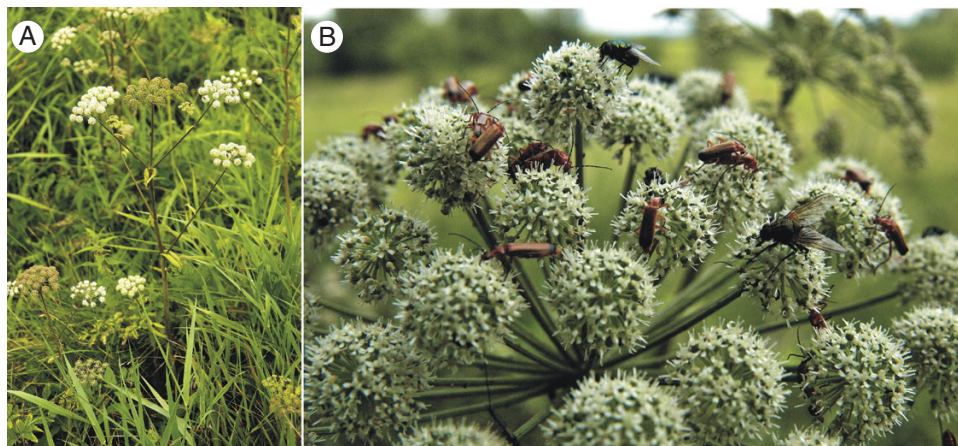

FIG. 1. (A). Flowering shoot of *Angelica sylvestris* showing main (primary) umbel in fruit and flowering lateral (secondary) umbels. (B). Insect visitors to female (pistillate) phase umbel include *Rhagonycha fulva* beetles and muscid and calliphorid flies.

Since earlier work conducted in the C population revealed that before 0800 h and after 1900 h flowers of *A. sylvestris* were visited by insects very rarely [in particular, no typically nocturnal insects (e.g. sphingid moths) were recorded (Niemirski and Zych, 2011)], we decided to restrict our observations to the parts of the day with the most intensive insect activity. Therefore, for each study day, observations commenced at 1000 h and ended at 1600 h at the latest. No more than four rounds for a particular umbel sexual phase were completed in a single day, which means that, for single populations, observations lasted for at least 3 full days. More often, however, inclement weather (strong winds or rain), led to a longer observation period, and observations were halted and re-commenced on subsequent days at the appropriate hour until all planned rounds were completed for any given umbel sexual phase per given year and population. Our observations were restricted to primary umbels because in most umbellifers, including the genus *Angelica*, they are mainly responsible for seed production (Ojala, 1986).

During insect sampling all individuals visiting the selected umbel were collected, killed with ethyl acetate, and pinned and stored for further investigation of their body pollen loads. We excluded from the analyses aphids and other small, sap-sucking insects (e.g. Thysanoptera), together with insects smaller than 1 mm, as these animals were usually observed clinging to the stylopodium and, even when moving around the flower, were too small to make effective contact with the stigma or anthers. Despite recent suggestions that ants may pollinate some umbelliferous species (Carvalho et al., 2008; Cursach and Rita, 2012a), we also excluded Formicidae from our analysis, since their ineffectiveness as pollinators was recently confirmed for a similar system (Zych et al., 2014).

The video recordings were analysed in the laboratory for the number of visits to individual inflorescences and the proportion of umbellets visited by a single insect within a particular compound umbel. As with other studies involving umbellifers (e.g. Lamborn and Ollerton, 2000; Niemirski and Zych, 2011; Zych et al., 2014), we grouped insect visitors on taxonomic grounds into the following visitor morphogroups: wasps (predatory wasps of the family Vespidae); hoverflies (insects of the family Syrphidae); muscoid flies (large >5 mm insects of the families Calliphoridae, Muscidae, Sarcophagidae and Tachinidae); beetles (insects of the order Coleoptera); and bees (Apoidea). Rare visitors from other taxonomic groups (e.g. butterflies, small flies <5 mm etc.) were pooled as ‘other’.

#### *Insect body pollen loads*

For the preparation and analysis of insect body pollen loads, the gelatin–fuchsin method of Dafni et al. (2005) was used. Using fine forceps, a Nikon SMZ 645 stereomicroscope and a small cube (~3–4 mm<sup>3</sup>) of gelatin–fuchsin jelly, all visible pollen grains adhering to the insect body surface were removed. The jelly was then transferred to a glass microscope slide, a coverslip applied and the slide gently heated over a flame to make a semi-permanent preparation. A Nikon Eclipse 100 light microscope was used to score the total number of pollen grains of both *A. sylvestris* and non-*A. sylvestris* taxa (hereafter referred to as ‘other’ pollen grains). The loads were subsampled (all pollen grains were scored for nine areas evenly

distributed over the coverslip) and the results, after calculating the arithmetic mean of each count, were extrapolated to the area of the coverslip to obtain the pollen load in any given sample. This method gives results comparable to counting total body pollen loads (Zych, 2007).

#### *Pollinator importance*

To estimate the pollination effectiveness of insect visitors, we adopted the approach used, for instance, by Zych (2002, 2007), Niemirski and Zych (2011) and Bouman et al. (2017). This included an indirect method (pollinator importance measure, *I*) based on counts of insect pollen loads, observations of insect frequency, and their abundance and behaviour on the flowers:

$$I_x = V \times U \times PL$$

where  $I_x$  is the importance of insect species  $x$ ,  $V$  is abundance (number of recorded visits of species  $x$  + number of captured individuals of species  $x$ )/(total number of recorded visits + total number of captured individuals),  $U$  is umbel penetration ratio (mean number of umbellets visited by species  $x$  within an umbel/mean number of umbellets in an average umbel in the population surveyed) and  $PL$  is average pollen load (number of pollen grains) carried by an individual of species  $x$ .

We calculated *I* separately for each population and for every study year, and then totalled for all the insect groups so as to obtain the maximum possible value. The importance coefficient (IC) of each insect group was expressed as a percentage of the total value.

#### *Floral phenotypes and population reproductive output*

In order to assess differences in floral characters and relative plant reproductive success in each population at the end of the growing season (September), we randomly collected 20–30 whole individual plants and mounted them on herbarium sheets. Later in the laboratory, using stereoscopic binoculars, for each plant we counted the number of umbellets in primary (main) umbels (equivalent to the size of an inflorescence) and the number of male/bisexual flowers. The number of bisexual flowers was calculated as the sum of developed fruits and non-pollinated flowers (ones that failed to form fruit). In order to assess seed set, we used the pooled counts from three randomly chosen umbellets from each main umbel. Seed set was calculated as the number of seeds divided by the number of bisexual flowers. We focused on inflorescence features since, in the Apiaceae, umbels rather than the minute flowers are recognized as units of attraction (Bell and Lindsey, 1978). Additionally, in 2012 we collected five fully ripe seeds from the main (first-order) umbel of each plant and weighed them using an analytical balance (AS 60/220/C/2 RADWAG; Radom, Poland).

#### *Nectar sampling*

In order to check for differences in floral rewards between populations, samples of nectar were collected in 2012 and 2013 from 15–25 flowers at the male stage and, owing to the smaller

volume of available nectar, from 30–40 flowers at the female stage. The small volume of nectar produced meant that we were only able to collect 23 samples in 2012 (9, 6 and 8, respectively from SW, C and NE plants) and 39 in 2013 (13 samples for each population). The nectar was collected using microcapillary pipettes of known mass, and subsequently expelled from the pipette onto a refractometer prism RL-4 (PZO, Warszawa, Poland), and nectar sugar concentration was calculated and expressed as a percentage weight of nectar.

In order to determine the composition of nectar sugars during both floral sexual stages, nectar from 50 flowers for each stage of development was collected using micro-pipettes, pooled and analysed by isocratic HPLC in conjunction with an LC1 Waters system. A 20- $\mu$ L aliquot of both sample and standard solution was injected. Water (MilliQ, pH 7), with a flow rate of 0.5 mL  $\text{min}^{-1}$ , was used as the mobile phase. Sugars were separated in a Waters Sugar-Pack I column (6.5–300 mm) maintained at 90 °C, and identified by a refractive index detector (Waters 2410). The fructose, glucose and sucrose contents were determined and expressed as percentages of total sugars.

Amino acid analysis of a 10- $\mu$ L sample of nectar collected and pooled from 50 flowers was performed by gradient HPLC using an ion-exchange Novapak C18 (15 mm  $\times$  4.6 mm) cartridge, with guard column maintained at 37 °C, and a Waters 470 scanning fluorescence detector (excitation at 295 nm, detection at 350 nm). A solvent composed of triethylammonium (TEA) phosphate buffer (pH 5.0) mixed with a 6:4 acetonitrile–water solution was used as the mobile phase at a flow rate of 1.0 mL  $\text{min}^{-1}$ . According to the AccQtag protocol (Waters), the selected volume of each reconstituted sample was amino acid-derived (Cohen and Micheaud, 1993) with 6-aminoquinolyl-N-hydroxysuccinimidyl carbamate (AQC) fluorescent reagent and 0.02 M borate buffer (pH 8.6). In addition to all the protein amino acids, standards of  $\beta$ -alanine, citrulline, L-homoserine,  $\alpha$ -aminobutyric acid (AABA),  $\gamma$ -aminobutyric acid (GABA), hydroxyproline, ornithine and taurine were also used.

To avoid intra-population variation in nectar production caused by environmental conditions, e.g. soil fertility and water stress, a common-garden approach was used for nectar sampling. In early spring 2012 and 2013, for each study population we randomly collected 25 young plant rosettes and transplanted them into individual pots using compost garden soil. These were kept under ordinary climatic conditions in the botanic garden (mean annual temperature +8.3 °C and mean annual rainfall 550.6 mm, based on data for the years 1951–2010) until the flowering stems appeared. Each season, before flowering commenced, plants for nectar experiments were transferred to a closed greenhouse chamber to prevent visits by insects, and, following flowering, were again transferred to the common-garden field. Throughout the whole growing season the plants were copiously watered.

#### Scent sampling

The same common-garden approach was used for scent sampling in 2016. Dynamic headspace scent samples were collected from the main inflorescence in full bloom from 20–25 plants per population following the method described by Kuppler *et al.* (2016). Samples of floral scent were collected in the laboratory from potted plants from each population. The umbels were enclosed within a polyester oven bag (Toppits®, Germany) for

15 min and the emitted volatiles were then trapped on 1.5 mg of Tenax (mesh 60–80; Supelco, Bellefonte, PA, USA) and 1.5 mg of Carbotrap B (mesh 20–40; Supelco) in a quartz vial (Varian; length 15 mm, inner diameter 2 mm) for 2 min using a membrane pump (G12/01 EB; ASF Rietschle-Thomas, Puchheim, Germany) with a flow rate of 200 mL  $\text{min}^{-1}$ . All samples were collected between 1000 and 1400 h. Scent samples were analysed using an automatic thermal desorption system (TD-20; Shimadzu, Japan) coupled with GC–MS (model QP2010 Ultra EI; Shimadzu, Japan). The GC–MS system was equipped with a ZB-5 fused silica column (5 % phenyl polysiloxane; 60 m long, inner diameter 0.25 mm, film thickness 0.25  $\mu$ m; Phenomenex) and the column flow (carrier gas: helium) was set to 1.5 mL  $\text{min}^{-1}$ . The GC oven temperature started at 40 °C (split ratio 1:1), then increased by 6 °C per minute to 250 °C and was then held constant for 1 min. The MS interface worked at 250 °C. Mass spectra were taken at 70 eV (in EI mode) from  $m/z$  30 to 350. The GC–MS data were processed using the GCMSolution package (Version 2.72; Shimadzu). Compounds were identified by comparison of the mass spectra and Kovats retention index with standard compounds, which are commercially available. Alternatively, compounds were identified using the mass spectral libraries Wiley 9, Nist 2011, FFNSC 2, Essential oils and Adams 2007, as well as the database available in MassFinder 3. The compounds found in the flowers were compared with those present in the blanks (empty oven bags) so as to determine which compounds were specifically emitted by inflorescences.

#### Transplantation experiment

In order to check the performance of plants from various sources in native versus non-native pollinator environments in 2015 and 2016, for each study site (SW, C and NE) we created a mixed population composed of potted plants originating from all three natural sites. Plants for potting were collected each year from source populations in spring, potted in compost garden soil and kept under prevailing weather conditions in the botanic garden until flowering. The plants were then transported to source populations so as to create experimental populations consisting of 24 plants in total (eight plants from each of SW, C and NE). Pots with plants were arranged according to the scheme shown in [Supplementary Data Fig. A](#). During flowering, insect activity on the primary umbel of each plant was recorded using digital video cameras. Since adaptation to local conditions may arise both through the male and female functions, this was performed twice for each plant (in male and female phase), and video recordings lasted 5 min each. Video recordings were analysed in the laboratory for insect visits (and, as previously, insect visitors were assigned to six morphogroups: bees, wasps, beetles, flies, syrphids and ‘other’). Experimental plants were left in the field until the early stage of fruit ripening and later transported to the botanic garden, where the numbers of fruits, non-pollinated female flowers and male flowers in primary umbels were scored.

#### Statistics

Statistica 13.1 (Dell) was used for most statistical calculations. To compare most reproductive characters between populations (except for seed set) we used one-way ANOVA. In

order to account for natural variation between study years and the resulting errors that could affect the model (Bolker et al., 2009), for visit frequency and nectar production we used the mixed-model ANOVA approach, treating the study year as a random factor. Where appropriate, the data were square root-transformed to obtain a normal distribution. Data on fruit set and nectar concentration could not be successfully transformed, and therefore for comparisons a generalized linear model implementing binary logistic distribution was used in the first case, and non-parametric Kruskal–Wallis ANOVA in the other. Temporal constancy of insect assemblages within a particular population was tested using the G-test, with the proportion of visits in the first year set as an expected proportion for subsequent years.

To test whether nectar amino acid and floral scent composition differed between populations, we used ‘random forest’ analysis (Breiman, 2001) implemented in the R package randomForest (R Development Core Team, 2011). This machine-learning algorithm made it possible to assign plant individuals from the three study populations to pre-defined groups (SW, C, NE) and to estimate the importance of particular amino acids and scent compounds for correctness of the assignment. This classification tool has been shown to be very powerful in classifying samples characterized by multiple variables (Junker and Keller, 2015). For our analysis,  $n_{tree} = 10\,000$  bootstrap samples were drawn with  $m_{try} \sim \sqrt{\text{variables}}$  randomly selected at each node. Random forest analysis returns a confusion matrix that shows the number of correctly assigned samples for each population (SW, C or NE), the proportional class error and a variable importance  $E$  for each amino acid (AA) and scent compound. A high variable importance indicates that this AA or scent component strongly separates the populations. Results of scent analysis were subject to non-metric multidimensional scaling (NMDS) based on Bray–Curtis distances of quantitative scent emissions using the R package vegan (Dixon, 2003).

## RESULTS

### *Insect visits and behaviour*

During the course of 3 years, we recorded 8477 insect visits to our study plants. The overall visit frequency was  $32 \pm 25$  visits per census (15 min), and this did not differ significantly between populations (data pooled over 3 study years; mixed-model ANOVA on square-root-transformed data, with population as fixed factor and year as random factor;  $F_{2,168} = 2.927$ ,  $P = 0.06$ ).

All visitor morphogroups were present for each site and, year by year, most insect visits (70–91 %) were made by dipterans (muscid flies and Syrphidae) and beetles. Generally, beetles were the main visitors to the SW population (depending on the year, 48–64 % of all recorded visits), whereas in the C population they represented only 1–10 % of visits, and for all study years this population was dominated by dipterans (depending on the year, 60–90 % of all recorded visits). The pattern of visits for the NE population was even less consistent. In 2011, 67 % of visits were made by beetles, whereas Diptera were predominant in 2012 (62 %) and 2013 (80 %). In 2012, we recorded increased visits to all sites by wasps (9, 4 and 4 %,

respectively, for the SW, C and NE populations), whereas in 2013, the warmest of all study years, a considerable proportion of visits was made by bees, which are usually rare (13, 28 and 5 %, respectively, for the SW, C and NE populations; in years 2011–12 for all populations  $\leq 5$  %). The observed patterns, however, were highly variable between populations and years (Fig. 2; for all comparisons  $P < 0.05$ , G-test).

Insect behaviour on umbels (calculated as the proportion of visited umbellets in an umbel) was variable across both years and populations, and showed no particular pattern (Supplementary Data Fig. B) (since the data on insect behaviour on umbels were to be used to compare visitation patterns of particular insect guilds, we employed non-parametric Kruskal–Wallis ANOVA). For example, for populations SW and NE we detected significant differences in insect activity each year, whereas for population C they were significant only for 2012.

### *Insect body pollen loads*

We analysed 2741 insect body pollen loads (987, 1020 and 734, respectively, for the SW, C and NE populations) and found large variation in pollen load between individual members of a particular morphogroup (averages for all recognized morphogroups for three populations over the three study years are presented in Supplementary Data Table S1). Both the number of *A. sylvestris* and ‘other’ pollen grains carried by an individual insect varied over four to five orders of magnitude, from virtually none to the largest pollen load of 541 227 *A. sylvestris* grains estimated for a wasp captured in 2011 on male-phase umbels in the SW population.

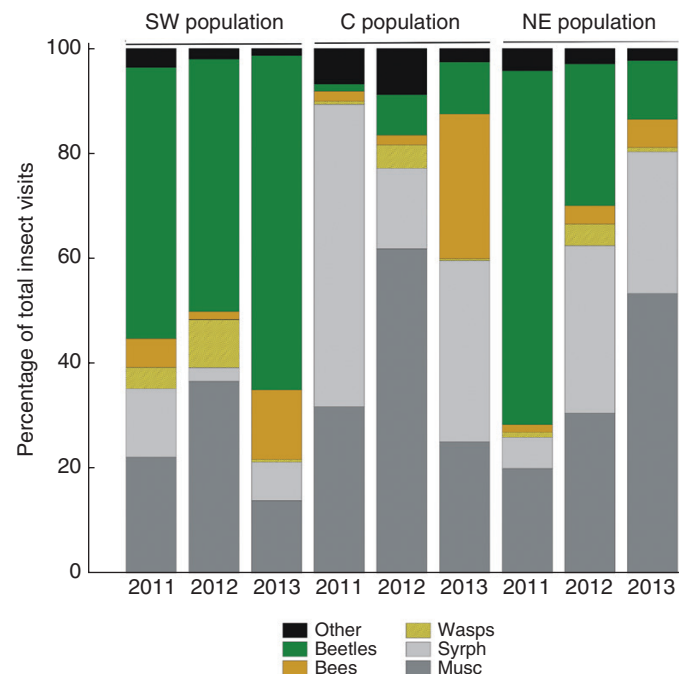

FIG. 2. Insect visits to umbels of *Angelica sylvestris* for years 2011–13 in the three study populations (SW, C and NE) expressed as the percentage of total visits for a given year within a particular population. Data are based on captures and video records. Musc, Muscoid flies; Syrph, Syrphidae.

By comparison, the largest ‘other’ pollen load, of 81 037 grains, was found on a beetle netted in 2011 on a female-phase umbel in the C population. Most of the analysed loads (~66 %) were composed of both types of pollen, and the quantities of *A. sylvestris* and ‘other’ pollen were positively correlated (Pearson’s product moment correlation coefficient  $r^2 = 0.1896$ ,  $P < 0.005$ ). Fifteen percent of all captured insects carried no pollen at all, whereas 15 and 4 % of loads were composed of only *A. sylvestris* and ‘other’ pollen grains, respectively. Overall, both the largest *A. sylvestris* load and the largest ‘other’ pollen load were carried by seldom-observed wasps (mean  $\pm$  s.d.  $22\,801 \pm 76\,655$  and  $3\,804 \pm 9\,610$  pollen grains, respectively). In the case of *A. sylvestris* pollen, the results for wasps exceeded those for other visitor groups by an order of magnitude. In population SW, these insects were the only visitor guild that significantly differed from others in their mean body pollen loads ( $P < 0.001$ , *post hoc* Tukey’s HSD test for unequal  $N$ ; data pooled for study years and umbel sexual phases). The remaining guilds bore average pollen loads of equal size (Fig. 3).

#### Pollinator importance

For all study populations, during the course of 3 years of sampling, the most important pollinators were flies (muscid and syrphids), beetles and hymenopterans (bees and wasps), with very marginal contribution from other insect groups. As in the visitation data, the relative contributions of particular insect groups remained highly variable between populations and across years (Fig. 4). Generally, flies were the key pollinators of plants in the C and NE populations (IC range 45–96 %), whereas beetles contributed most to the pollination of SW plants, but played a rather marginal role in the pollination of the two remaining populations (IC from 0 to a maximum of 17

% in 2012 for NE). The results for hymenopterans (bees and wasps) were even more variable across years, and the morphogroups usually replaced each other, i.e. if the contribution of bees was noteworthy (as in 2013 for SW or C), wasps were effectively absent and vice versa (2011 in SW or NE, and 2012 in C).

#### Floral characters and reproductive success of populations

We did not detect differences in umbel sex ratios: in plants from all three populations, main (primary) umbels were composed only of bisexual flowers. Our study populations differed in primary umbel size (measured as the mean number of umbellets), but this was inconsistent over the years. In 2012, the largest primary umbels were produced by plants from the NE and SW populations, whereas the smallest were found in plants from the C population. By contrast, the latter were the largest in 2013 (owing to unexpectedly late mowing of the NE population that year, we were unable to collect plants from this site). In either year, all populations scored nearly 100 % fruit set, and we found no significant differences between study sites. We did, however, find differences in seed mass, with significantly heavier seeds recorded for the SW population (Table 1).

#### Nectar

Plants from study populations produced hexose-rich nectar composed of fructose, glucose and sucrose [sucrose/(glucose + fructose) ratio of 0.18, 0.19 and 0.12, respectively for SW, C and NE plants], with similar proportions for the three detected sugars (Supplementary Data Fig. C).

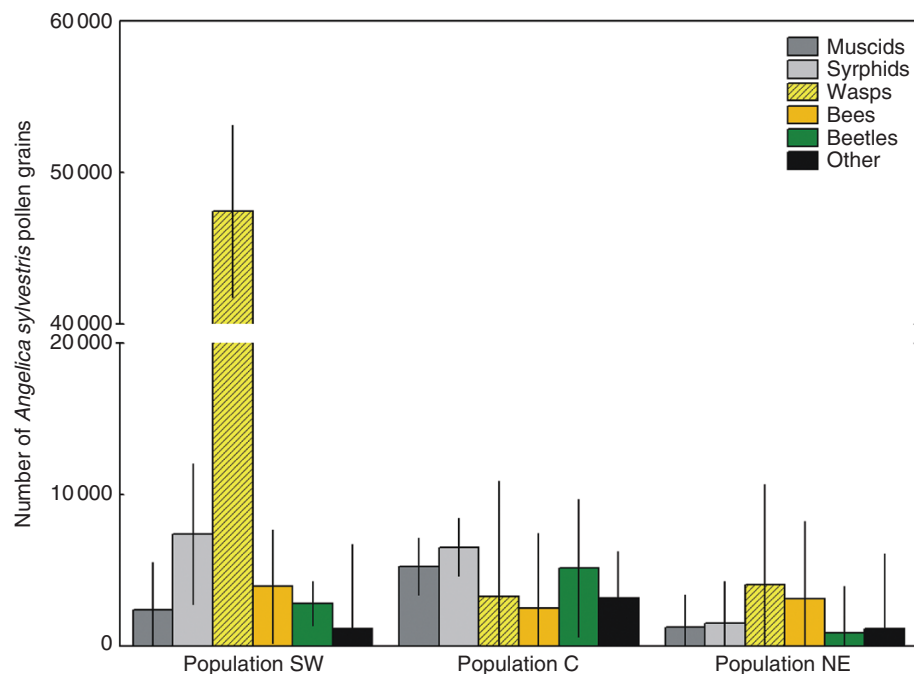

Fig. 3. Average body pollen loads carried by members of a particular pollinator morphogroup. Error bars indicate 95 % confidence limits of the mean. Data were pooled for study years and umbel sexual phases. Note the gap in the y-axis.

In 2012, plants from different populations produced nectar of similar sugar concentration [overall, the 2012 mean was  $26.2 \pm 14.4\%$ ; pooled data from male- and female-phase umbels; Kruskal–Wallis ANOVA<sub>2012</sub>,  $H(2, N = 23) = 3.450345$ ,  $P = 0.178$ ]. However, nectar sugar concentration varied between populations in 2013 [Kruskal–Wallis ANOVA<sub>2013</sub>,  $H(2, N = 39) = 9.150101$ ,  $P = 0.010$ ]. The lowest sugar concentration for 2013 (mean  $\pm$  s.d.  $15.4 \pm 5.5\%$ ) was found in C plants, but was significantly higher ( $23.1 \pm 6.4\%$ ) for SW plants (sugar nectar concentration for NE plants,  $20.9 \pm 6.5\%$ , did not differ significantly from that of either group).

The SW and C plants produced nectar that was relatively richer in amino acids ( $0.12 \pm 0.07$  and  $0.16 \pm 0.08$  mM, respectively), whereas the amino acid concentration for the NE plants was ~3-fold lower ( $0.05 \pm 0.01$  mM). Unfortunately, due to low nectar volumes, we were able only to analyse two male-phase samples per population, and the recorded differences were

not statistically significant [Kruskal–Wallis ANOVA,  $H(2, N = 6) = 3.7143$ ,  $P = 0.16$ ].

We detected 19 different AAs in the collected samples of nectar (Fig. 5). Only alanine, proline, phenylalanine,  $\beta$ -alanine and  $\beta$ -aminobutyric acid (BABA) were detected in at least one sample from each of the three populations, and many AAs were population-specific. For example, asparagine, glutamine, citrulline, arginine, glycine, taurine, valine and isoleucine were recorded only for the C population, whereas lysine was unique to NE and histidine to SW samples. Random forest analysis assigned all SW samples to the NE population, indicating that these populations are not well separated and that C plants differed in nectar AA profiles from individuals constituting the other two populations. The estimated error rate for the whole data set was 66.67%, indicating that two-thirds of the samples were not correctly assigned to the populations.

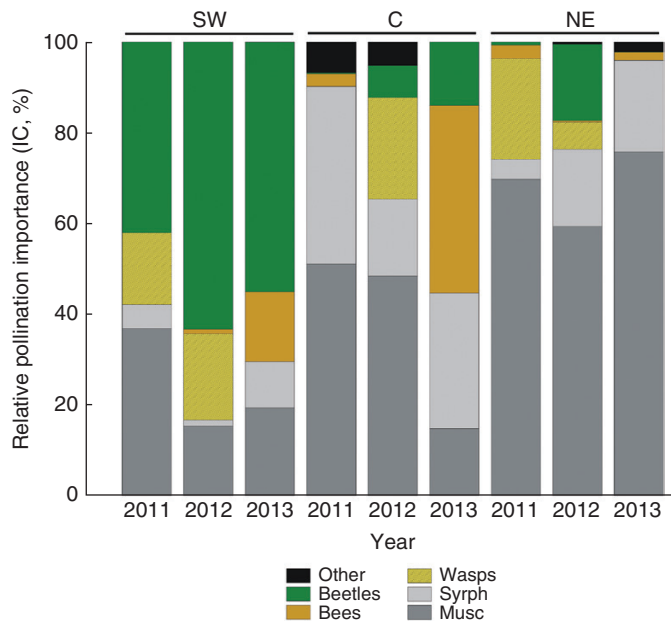

FIG. 4. Relative pollination importance of insect visitors to umbels of *Angelica sylvestris* in years 2011–13 for the three study populations: SW (Milicz, south-west Poland); C (Kleczkowo, north-east Poland); and NE (Šiauliai, north-east Lithuania), based on visitation data, pollen loads and behaviour on flowers. Musc, muscoid flies; Syrph, Syrphidae.

#### Floral scent emissions

In total, we detected 44 floral scent compounds in 34 samples collected from plants derived from the three study populations. Our populations overlapped for the presence/absence of most compounds (Supplementary Data Table S2), but the proportional composition differed between populations (random forest out-of-basket estimate of error rate 32.35%). Ten out of 13 samples from the NE population were correctly assigned to this population (random forest class error 23.08%). Assignments of samples from the C and SW populations received slightly higher random forest class errors: 37.5 and 38.46%, respectively. This result is also reflected in the ordination (non-metric multidimensional scaling NMDS based on Bray–Curtis distances of quantitative scent emissions; Fig. 6). Despite some overlap of the samples from different populations, the population centroids were clearly separate (population factor fitted onto NMDS:  $R^2 = 0.15$ ,  $P = 0.033$ ).

#### Transplantation experiment

Even before flowering, some of our experimental plants were attacked by powdery mildew. Furthermore, developing fruit often attracted sap-feeding insects (hemipterans). Consequently, some inflorescences died before flowering could

TABLE 1. Reproductive characters of plants from study populations. Number of umbellets was treated as a proxy for inflorescence size. Data are given for primary (main) umbels and presented as mean  $\pm$  s.d. (sample size). Means with different letters are different at  $P < 0.05$  (post hoc Tukey HSD test for unequal N). Data on fruit set could not be successfully transformed, and therefore a generalized linear model implementing binary logistic distribution was used for comparisons. In 2013, owing to unexpectedly late mowing of the study site, we were unable to collect plants from the NE (Šiauliai) population

|                           | SW (Milicz)                      | C (Kleczkowo)                    | NE (Šiauliai)                    | P      |
|---------------------------|----------------------------------|----------------------------------|----------------------------------|--------|
| Number of umbellets, 2012 | $30 \pm 7$ (28) <sup>a</sup>     | $25 \pm 7$ (27) <sup>b</sup>     | $36 \pm 8$ (12) <sup>a</sup>     | <0.001 |
| Number of umbellets, 2013 | $22 \pm 5$ (29)                  | $30 \pm 7$ (14)                  |                                  | <0.001 |
| Mean fruit set, 2012      | $0.99 \pm 0.02$ (24)             | $0.95 \pm 0.14$ (27)             | $0.95 \pm 0.14$ (12)             | ns     |
| Mean fruit set, 2013      | $0.95 \pm 0.10$ (29)             | $0.98 \pm 0.06$ (14)             |                                  | ns     |
| Mean seed mass (mg)       | $2.1 \pm 0.6$ (175) <sup>a</sup> | $1.8 \pm 0.6$ (125) <sup>b</sup> | $1.7 \pm 0.6$ (140) <sup>b</sup> | <0.001 |

ns, not significant.



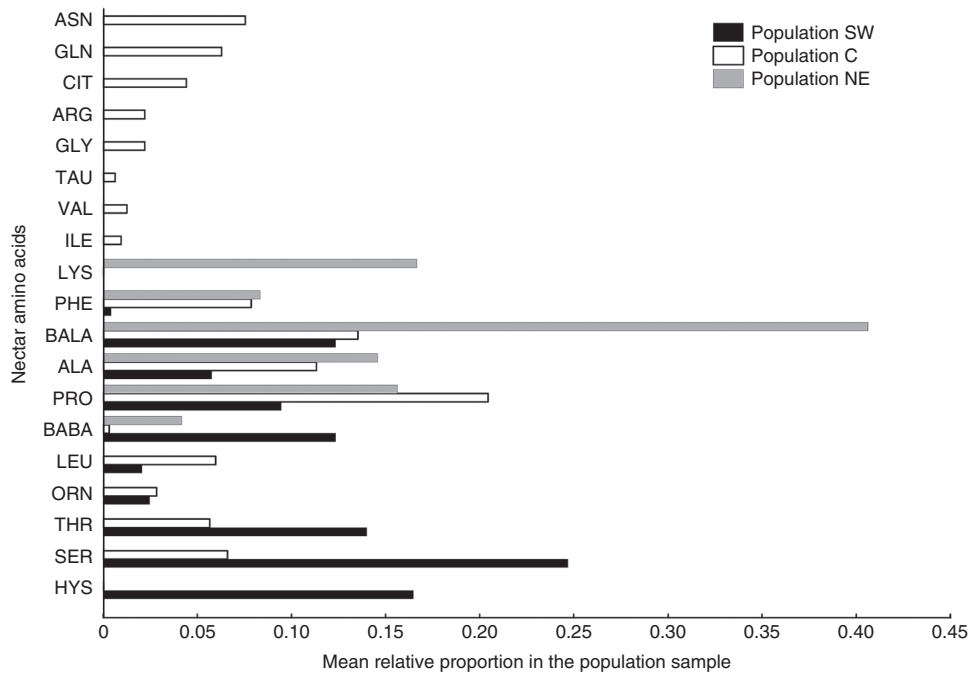

FIG. 5. Amino acid profile of *Angelica sylvestris* nectar produced by plants originating from the three study populations (SW, C and NE) shown as the mean relative proportion of a particular compound in each population sample.

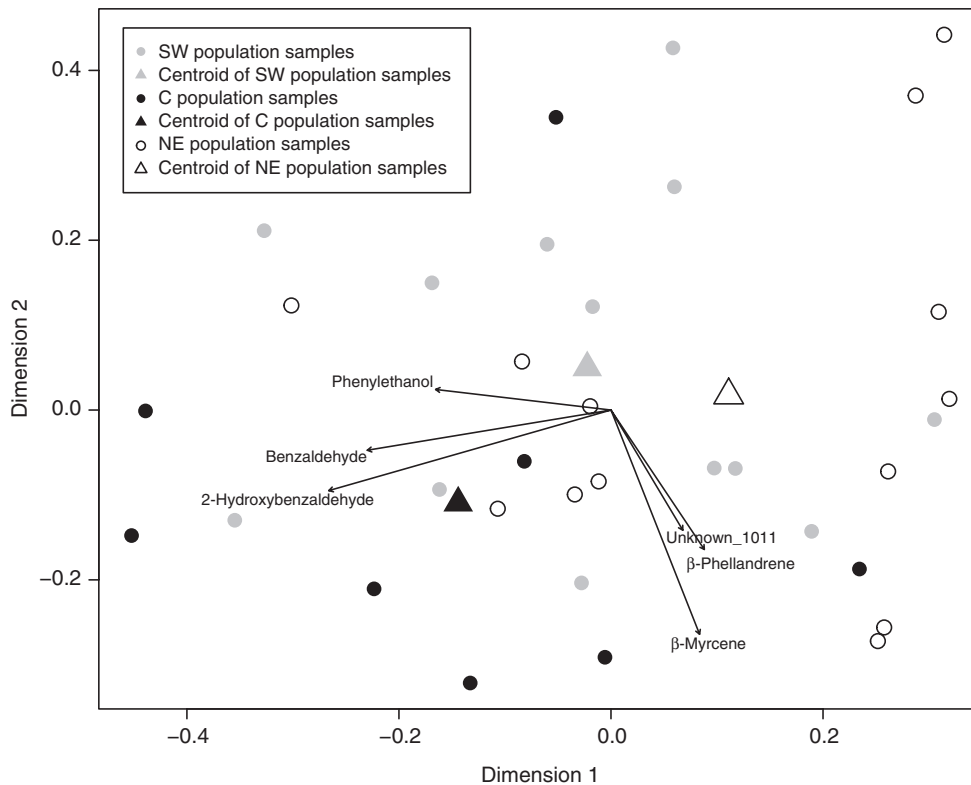

FIG. 6. Differences in scent composition of *Angelica sylvestris* flowers from three populations. Ordination shows results of NMDS based on Bray-Curtis distances on quantitative emission rates of flowers. Each sample is displayed as a circle and the population centroids are shown as triangles. Volatile organic compounds that significantly ( $P < 0.01$ ) correlated with samples in the plot are shown as vectors. Emission rates of compounds shown in the plot (arrows) are greater in those samples that are plotted in the direction of the vectors.

occur, which in some cases drastically reduced our sample size for insect video recordings and seed-set analysis.

Generally, regardless of population, all plants were visited equally by insects. The only exception was recorded in 2015, when in the C and NE populations C plants were visited more frequently than NE plants [Kruskal–Wallis ANOVA, C population,  $H(2, N = 46) = 6.8110, P = 0.03$ ; NE population,  $H(1, N = 34) = 10.2235, P = 0.001$ ; unfortunately, that year we lost all SW plants in the NE population due to powdery mildew]. Furthermore, no increase in visitation to male-phase umbels of local plants was observed (Fig. 7).

Seed set for our experimental (potted) plants was lower than in data obtained from naturally occurring individuals (69–97%), but for both years it remained constant within source populations regardless of plant origin (Table 2).

## DISCUSSION

Our study documented substantial geographical and temporal variation in the pollination system of *A. sylvestris*, which provides little evidence that the surveyed populations represent distinct pollination ecotypes. Although visitor assemblages remained similar qualitatively, i.e. all main morphogroups

were present in all three study populations, the contribution of a given pollinator morphogroup was variable between populations and over the years. In general, however, the SW population was more often visited and pollinated by beetles, whereas the remaining two (C and NE) were visited rather by dipterans. Interestingly, the results for the C population agree with those obtained previously for the same locality by Niemirski and Zych (2011), who recorded that, over two study years (2006 and 2007), dipterans were consistently responsible for ~90% of pollination events. This suggests that the temporal consistency of pollinators in the case of our study species may be maintained over longer periods, a necessary precondition for the local specialization of populations depending on pollination by flies and beetles. However, specialization is unlikely when different pollen vectors play the same role as selective agents due to their functional equivalency (Gómez and Zamora, 1999; Zamora, 2000). This appears to be the case in *A. sylvestris*, in which most visitor groups, including dominant beetles and flies, seem to be equally effective on flowers, at least where insect body pollen loads are concerned. Similar spatial (and temporal) turnover of equivalent pollinators can be observed for some other umbellifers, such as *D. carota*, because various populations of this species in the UK are mainly visited

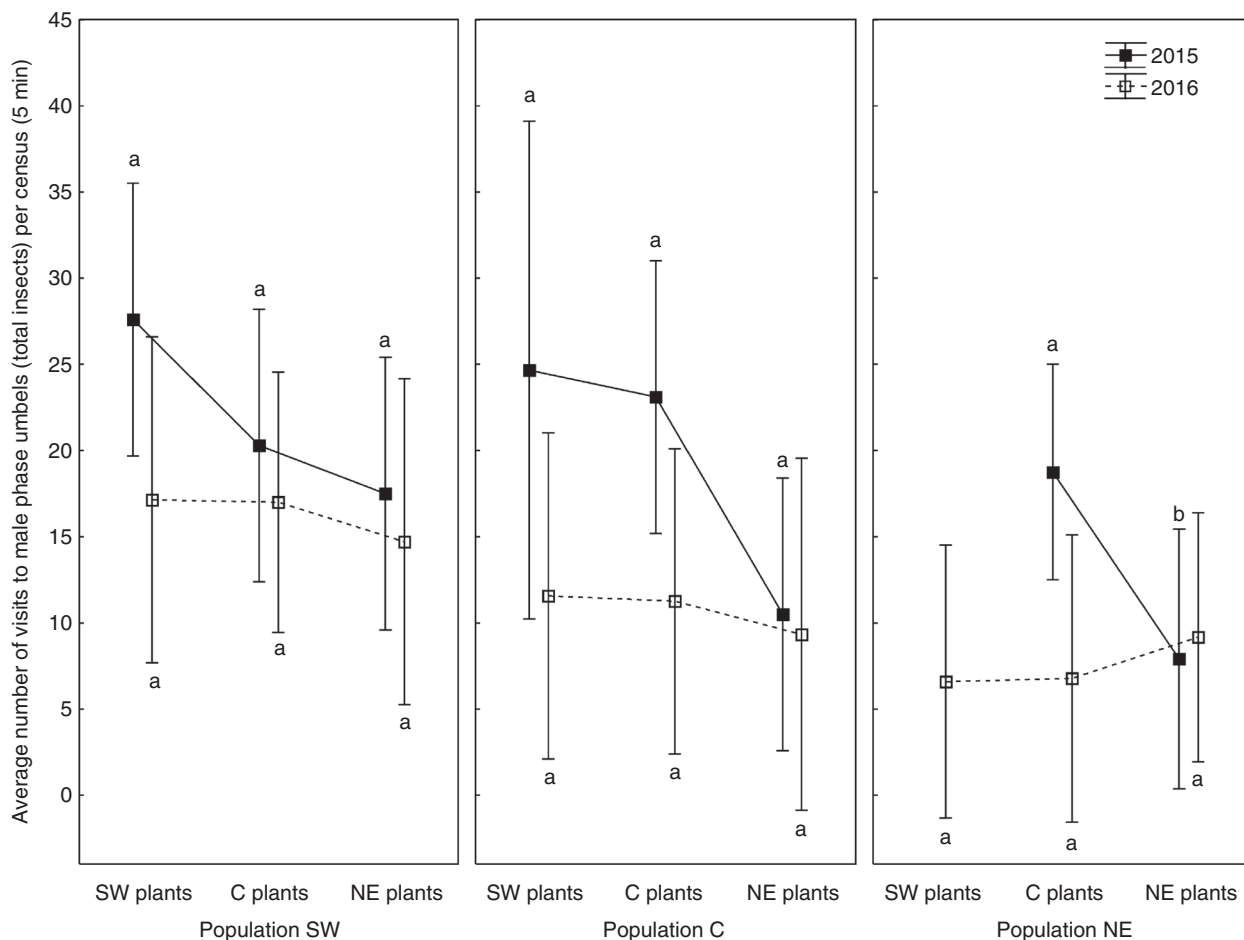

FIG. 7. Average frequency (and 95% confidence interval of the mean) of total insect visits to male-phase umbels of experimental *Angelica sylvestris* plants in various population settings during the transplantation experiment over the course of 2 years. Means with different letters are different at  $P < 0.05$  (Kruskal–Wallis ANOVA calculated for each site and study year).

TABLE 2. Seed set, shown as average  $\pm$  s.d. (sample size), for three source populations over the course of 2 years. Results for plants of various origins were compared within each population using a generalized linear model implementing binary logistic distribution

| Plant origin  | SW                   | C                    | NE                   | P  |
|---------------|----------------------|----------------------|----------------------|----|
| Population SW |                      |                      |                      |    |
| 2015          | 0.86 $\pm$ 0.06 (10) | 0.88 $\pm$ 0.07 (10) | 0.79 $\pm$ 0.19 (10) | ns |
| 2016          | 0.91 $\pm$ 0.10 (5)  | 0.92 $\pm$ 0.11 (7)  | 0.80 $\pm$ 0.21(7)   | ns |
| Population C  |                      |                      |                      |    |
| 2015          | 0.85 $\pm$ 0.05 (3)  | 0.86 $\pm$ 0.07 (10) | 0.89 $\pm$ 0.05 (10) | ns |
| 2016          | 0.97 $\pm$ 0.04 (7)  | 0.69 $\pm$ 0.38 (8)  | 0.82 $\pm$ 0.28 (7)  | ns |
| Population NE |                      |                      |                      |    |
| 2015          |                      | 0.86 $\pm$ 0.03 (2)  | 0.74 $\pm$ 0.04 (3)  | ns |
| 2016          | 0.79 $\pm$ 0.31 (9)  | 0.80 $\pm$ 0.30 (8)  | 0.70 $\pm$ 0.32 (8)  | ns |

ns, not significant.

by beetles (*Rhagoxycha fulva*, which was also abundant in our study), sawflies (*Tenthredo* sp.) or dipterans carrying similar amounts of pollen (Lamborn and Ollerton, 2000). According to these authors, the plants rely on functionally similar groups that fluctuate over the years in terms of their abundance, but collectively do not differ in their importance.

The only marked exception in our study were wasps, whose body pollen loads in the SW population exceeded those of other pollinators by one order of magnitude. This result is probably due to the fact that, of the recorded insect visitors, Vespidae had the largest bodies. These insects, however, were also quite erratic visitors, both in SW and the other two populations, and were almost completely absent from all three study sites in 2013. This finding resembles that for a 3-year study of the umbelliferous plant *Ostericum palustre*, in which wasps were key pollinators for a single season and virtually absent for the rest (Zych et al., 2014). Generally, wasps seem to be rather opportunistic visitors to Apiaceae flowers (Zych, 2002; Zych et al., 2014), but their presence and sometimes aggressive behaviour can affect the performance of other pollinators. Fluctuations in the annual abundance of wasps may be caused by, for example, unfavourable climatic conditions (Archer, 2001). They are thus unlikely to exert a significant selective pressure on the studied system. Nevertheless, where other visitor groups are concerned, even the smaller average pollen loads were more than sufficient to pollinate *A. sylvestris* flowers, which contain only two ovules. Indeed, seed set was invariably close to 100 % in all studied localities, and the populations did not seem to be pollen-limited. In such situations, if plants bear few ovules per flower and thus require relatively few pollen grains for a full seed set, the probability that two visitors are equally effective pollinators increases (Johnson et al., 1995). This, contrary to the earlier suggestions of Niemirski and Zych (2011), even further minimizes the probability that *A. sylvestris* could specialize for pollination by the most abundant insect visitors. In most cases, for example, we found no significant correlation between the per-visit effectiveness of each visitor morphogroup (measured here as body pollen loads) and their abundance, which, according to some authors (Gómez and Zamora, 2006, and references therein), indirectly indicates the absence of specialization.

This lack of specialization on the most abundant visitors was further confirmed by our transplantation experiment. Although seed set in potted plants was smaller than in natural populations,

which was probably caused by suboptimal growing conditions, we observed differences neither in insect activity nor in the seed set of plants derived from natural populations grown in common-garden conditions. One marked exception was a reduction in insect visits to NE plants in the C and NE populations in 2015, which, however, did not result in decreased seed set.

Pollinators can also act as selective agents solely through an increase in male fitness, while female fitness remains unaffected (van der Niet et al., 2014a). However, in *A. sylvestris* we found little evidence to support this hypothesis. In particular, no increase in insect visitation to male-phase umbels was observed either in the transplantation experiment or during observations in natural populations, and therefore this possibility seems of little significance.

In view of this, our finding that differences in insect visitor assemblages were generally not associated with changes in the floral characters of populations seems to confirm the very generalist pollination strategy of the investigated species. This similarity extends to floral rewards, especially nectar characteristics, which were generally constant across our study sites, at least as far as sugar concentration and profile were concerned. The observed sugar profile was also similar to that recorded in previous reports for *A. sylvestris* (Stpiczyńska et al., 2015), thus confirming proposals concerning the conservative character of this floral trait within a species (Roy et al., 2017). The most noticeable exception was the overall nectar AA composition of the C population, whose nectar, unlike that of the other two populations, contained several AAs, including non-protein AAs, such as citrulline or taurine, absent elsewhere. This variation between populations challenges previous ideas regarding the species-specific constancy of nectar AAs (Baker and Baker, 1986), but affirms more recent studies which demonstrate considerable variation in this nectar trait (e.g. Lanza et al., 1995; Terrab et al., 2007; Gijbels et al., 2014). Nevertheless, like a previous study of *A. sylvestris* nectar (Stpiczyńska et al., 2015), our survey showed that proline and alanine are core constituents of the nectar AA profile in all surveyed populations, but also confirmed that the nectar contains a substantial proportion of non-protein  $\beta$ -alanine, which in the SW population constituted >40 % of all nectar AAs. Alanine and proline are generally common nectar AAs (Baker, 1977), the latter being preferred by many pollinators, especially bees, probably because of its role in insect flight (Teulier et al., 2016). Generally, insects seem to prefer high concentration of AAs, perhaps because of their alimentary value and specific taste (Baker, 1977; González-Teuber and Heil, 2009; Roy et al., 2017), which might explain fewer visits to our experimental NE plants, which contained smaller quantities of AAs. This aspect of *A. sylvestris* pollination biology most certainly deserves further attention.

Regarding scent bouquets, our study plants produced floral odours that were mostly composed of various terpenoids and aromatic compounds, and resembled those found in earlier studies focused on *A. sylvestris* or other Apiaceae (Borg-Karlson et al., 1994; Tollsten et al., 1994). Such compounds are usually interpreted not as species-specific cues, but rather as a signal for a wide spectrum of insect visitors (Willmer, 2011). All volatile organic compounds found in *A. sylvestris* scent are common in floral bouquets. For example, benzaldehyde is found in 64 % and phenylethanol in 54 % of plant families investigated so far (Knudsen et al., 2006); nevertheless,

their specific role may change depending on the insect taxon involved in the interaction (Junker, 2016). Although we found a clear qualitative overlap in scent bouquets between populations, the overall composition varied, the most prominent differences being related to 2-hydroxybenzaldehyde, benzaldehyde,  $\beta$ -myrcene,  $\beta$ -phellandrene and phenylethanol. Some of these compounds can also be associated with nocturnal pollination (Dobson, 2006), but earlier study showed that *A. sylvestris* flowers are scarcely visited by moths or other night-active insects. Differences in quantitative scent composition observed also for other Apiaceae, e.g. *Laserpitium latifolium* (Borg-Karlson et al., 1994), can likewise be related to non-pollinating insect visitors such as herbivores. This, however, requires further experimental study. It is unlikely, however, that the observed differences in floral phenotypes could be solely attributed to genetic drift because, given the size of populations and dependency of *A. sylvestris* reproduction on pollination and subsequent seed set, even weak selection could override the effects of random drift (Lande, 1976). Therefore, the overall picture appears to be the one of ‘adaptive wandering’, as described by Wilson and Thomson (1996). In this process, allopatric populations may diverge in response to local pollinator communities. This, however, does not result in a pollinator shift in *A. sylvestris* because the direction, strength and manner of selective pressure act too briefly to cause any substantial morphological and phenotypic changes that could exclude any type of pollinator. Furthermore, given the equivalency of *A. sylvestris* pollinators and their generalist character, any specialization could perhaps be only achieved by altering floral morphology rather than traits like scent or nectar composition that seem to appeal to a wide spectrum of floral visitors. An example of such a pathway was described for North American *Thaspium* and *Zizia* populations pollinated by the oligolectic bee *Andrena ziziae* (Lindsey, 1984). Despite the general attraction of various insect pollinators to these plants, the latter were regularly pollen-limited (seed set 50–80 %), and their adaptations for enhancing successful pollination included subtle modifications of floral traits (such as a corolla tube formed by folding of the petals and stamens; Lindsey and Bell, 1985).

In general, umbellifers, especially *A. sylvestris*, appear to be morphologically well adapted to ecological generalization (Lindsey and Bell, 1985; Corbet, 2006). Specialization in this plant family, perhaps, occurs only under very special circumstances, for example when the pollinator community is composed of insect visitor groups that clearly differ in their capacity to pollinate (e.g. due to differences in their functional morphology) and/or have different perceptual biases (e.g. for colour or scent). However, the barrier to the evolution of any morphological adaptation resulting in the fine-tuning of the flower towards particular pollinator types may arise from the architectural constraints on the floral bauplan that make umbellifers so uniform in their floral displays, and so successful in attracting large numbers of pollinators.

#### SUPPLEMENTARY DATA

Supplementary data are available online at <https://academic.oup.com/aob> and consist of the following. Fig. A: arrangement of potted plants during transplantation experiments. Fig. B:

inflorescence penetration ratio (proportion of visited umbellets in an umbel) by various visitor morphogroups for three study populations over the 3 years of study. Results of Kruskal–Wallis ANOVA are shown. Error bars indicate standard deviation of the mean. Vesp, wasps; Bee, bees; Syrph, hoverflies; Musc, muscoid flies; Col, beetles. Fig. C: *Angelica sylvestris* nectar sugar composition in the surveyed populations, expressed as percentages of fructose (Fru), glucose (Glu) and sucrose (Suc) relative to total sugars. Table S1: body pollen loads of insect visitors to *Angelica sylvestris* umbels in the three study populations. Table S2: scent emission of *Angelica sylvestris* in the three populations.

#### ACKNOWLEDGEMENTS

We thank Klaudia Dzierżyk, Dorota Jaczewska, Agnieszka Krzyk, Iza Łapińska-Zych, Paweł Pstrokoński, Magdalena Rudnicka, Irmgard Schäffler, Anna Szaciłło, Joseph Thiry, Włodzimierz Winiarski, Magdalena Włodarska, Maciej Ziemiański, Marianna Zych and Michalina Zych for help in collecting field data and laboratory analyses; Dorota Szubierajska for help in maintaining the experimental plants; Asta Klimiene for help with the localization of the NE population, and the landlords of Kleczkowo village (C population), Ryszard Gocłowski, Krystyna Dzwonkowska and Stanisław Dzwonkowski, for logistic help and access to their meadows. Last but not least we thank Jeff Ollerton and Timotheüs Van der Niet for valuable comments that greatly improved the quality of the paper. M.Z. conceived the study; M.Z., K.R. and B.S. collected and assembled field data; M.S. and M.N. performed nectar analysis; K.R., R.R.J. and M.Z. performed scent analysis; M.Z. and K.R. conducted transplantation experiments; M.Z., R.R.J. and K.R. analysed the data; M.Z. wrote the draft version of the paper. All authors contributed to the final version. This work was supported by the Polish National Science Centre (2011/01/B/NZ8/03146 to M.Z.) and the Ministry of Science and Higher Education through the Faculty of Biology, University of Warsaw intramural grant DSM (112629/2016 to K.R.).

#### LITERATURE CITED

- Aigner PA. 2005. Variation in pollination performance gradients in a *Dudleya* species complex: can generalization promote floral divergence? *Functional Ecology* **19**: 681–689.
- Armbruster WS, Fenster CB, Dudash MR. 2000. Pollination “principles” revisited: specialization, pollination syndromes, and the evolution of flowers. In: Totland O, ed. *The Scandinavian Association for Pollination Ecology honours Knut Faegri*. Oslo: Det Norske Videnskaps-Akademi.
- Anderson B, Alexandersson R, Johnson SD. 2009. Evolution and coexistence of pollination ecotypes in an African *Gladiolus* (Iridaceae). *Evolution* **64**: 960–972.
- Archer ME. 2001. Changes in abundance of *Vespula germanica* and *V. vulgaris* in England. *Ecological Entomology* **26**: 1–7.
- Armbruster WS. 1985. Patterns of character divergence and the evolution of reproductive ecotypes of *Dalechampia scandens* (Euphorbiaceae). *Evolution* **39**: 733–752.
- Armbruster WS, Muchhala N. 2009. Associations between floral specialization and species diversity: cause, effect, or correlation? *Evolutionary Ecology Research* **23**: 159–179.
- Artz DR, Villagra CA, Raguso RA. 2010. Spatiotemporal variation in the reproductive ecology of two parapatric subspecies of *Oenothera cespitosa* (Onagraceae). *American Journal of Botany* **97**: 1498–1510.

- Baker HG.** 1977. Non-sugar chemical constituents of nectar. *Apidologie* **8**: 349–356.
- Baker HG, Baker I.** 1986. The occurrence and significance of amino acids in floral nectar. *Plant Systematics and Evolution* **151**: 175–186.
- Bartoš M, Tropek R, Spitzer L, et al.** 2015. Specialization of pollination systems of two co-flowering phenotypically generalized *Hypericum* species (Hypericaceae) in Cameroon. *Arthropod-Plant Interactions* **9**: 241–252.
- Bell CR.** 1971. Breeding systems and floral biology of the Umbelliferae or evidence for specialization in unspecialized flowers. In: Heywood VH, ed. *The biology and chemistry of the Umbelliferae*. London: Academic Press, 93–107.
- Bell CR, Lindsey AH.** 1978. The umbel as a reproductive unit in the Apiaceae. In: *Actes du 2eme Symposium International sur les Ombelliferes. Contributions pluridisciplinaires a la Systematique*. Perpignan, France: Missouri Botanical Garden, 739–747.
- Bisht AK, Bhatt A, Rawal RS, Dhar U.** 2008. Assessment of reproductive potential of different populations of *Angelica glauca* Edgew., a critically endangered Himalayan medicinal herb. *Journal of Mountain Science* **5**: 84–90.
- Bolker BM, Brooks ME, Clark CJ, et al.** 2009. Generalized linear mixed models: a practical guide for ecology and evolution. *Trends in Ecology & Evolution* **24**: 127–135.
- Borg-Karlson AK, Valterova I, Nilsson LA.** 1994. Volatile compounds from flowers of six species in the family Apiaceae – bouquets for different pollinators. *Phytochemistry* **35**: 111–119.
- Bouman RW, Steenhuisen SL, van der Niet T.** 2017. The role of the pollination niche in community assembly of *Erica* species in a biodiversity hotspot. *Journal of Plant Ecology* **10**: 634–648.
- Breiman L.** 2001. Random forests. *Machine Learning* **45**: 5–32.
- Brody AK.** 1997. Effects of pollinators, herbivores, and seed predators on flowering phenology. *Ecology* **78**: 1624–1631.
- Brosi BJ.** 2016. Pollinator specialization: from the individual to the community. *New Phytologist* **210**: 1190–1194.
- Cannon JFM.** 1968. *Angelica* L. In: Tutin TG, Heywood VH, Burges NE et al., eds. *Flora Europaea*, Vol. 2. Cambridge: Cambridge University Press, 357–358.
- Carvalho LG, Barbosa ERM, Memmott J.** 2008. Pollinator networks, alien species and the conservation of rare plants: *Trinia glauca* as a case study. *Journal of Applied Ecology* **45**: 1419–1427.
- Castro S, Loureiro J, Ferrero V, Silveira P, Navarro L.** 2013. So many visitors and so few pollinators: variation in insect frequency and effectiveness governs the reproductive success of an endemic milkwort. *Plant Ecology* **214**: 1233–1245.
- Cohen SA, Michaud DP.** 1993. Synthesis of a fluorescent derivatizing reagent, 6 aminoquinolyl-N-hydroxysuccinimidyl carbamate, and its application for the analysis of hydrolyzate amino acids via high performance liquid chromatography. *Analytical Biochemistry* **211**: 279–287.
- Corbet SA.** 2006. A typology of pollination systems: implications for crop management and the conservation of wild plants. In: Waser NM, Ollerton J, eds. *Plant-pollinator interactions. From specialization to generalization*. Chicago: University of Chicago Press, 315–340.
- Cosacov A, Nattero J, Cocucci AA.** 2008. Variation of pollinator assemblages and pollen limitation in a locally specialized system: the pil-producing *Nierembergia linearifolia* (Solanaceae). *Annals of Botany* **102**: 723–734.
- Cosacov A, Cocucci AA, Sérsic AN.** 2014. Geographical differentiation in floral traits across the distribution range of the Patagonian oil-secreting *Calceolaria polyrhiza*: do pollinators matter? *Annals of Botany* **113**: 251–266.
- Cruden RW, Hermann-Parker SM.** 1977. Temporal dioecism: an alternative to dioecism? *Evolution* **31**: 863–866.
- Cursach J, Rita J.** 2012a. Implications of the reproductive biology of the narrow endemic *Naufraga balearica* (Apiaceae) for its conservation status. *Plant Systematics and Evolution* **298**: 581–596.
- Cursach J, Rita J.** 2012b. Reproductive biology and reproductive output assessment in natural and introduced subpopulations of *Apium bermejoi*, a ‘Critically Endangered’ endemic plant from Menorca (western Mediterranean). *Nordic Journal of Botany* **30**: 754–768.
- Dafni A, Kevan PG, Husband BC.** 2005. *Practical pollination ecology*. Cambridge, Ontario: Enviroquest.
- Danderson CA, Molano-Flores B.** 2010. Effects of herbivory and inflorescence size on insect visitation to *Eryngium yuccifolium* (Apiaceae), a prairie plant. *American Midland Naturalist* **163**: 234–246.
- Davila YC, Wardle GM.** 2007. Bee boys and fly girls: do pollinators prefer male or female umbels in protandrous parsnip, *Trachymene incisa* (Apiaceae)? *Austral Ecology* **32**: 798–807.
- Davila YC, Wardle GM.** 2008. Variation in native pollinators in the absence of honeybees: implications for reproductive success of an Australian generalist-pollinated herb *Trachymene incisa* (Apiaceae). *Botanical Journal of the Linnean Society* **156**: 479–490.
- Dixon P.** 2003. VEGAN, a package of R functions for community ecology. *Journal of Vegetation Science* **14**: 927–930.
- Dobson HEM.** 2006. Relationship between floral fragrance composition and type of pollinator. In: Dudareva N, Pichersky E, eds. *Biology of floral scent*. Boca Raton: CRC Press, 147–198.
- Ellis WN, Ellis-Adam AC.** 1993. To make a meadow it takes a clover and a bee: the entomophilous flora of NW Europe and its insects. *Bijdragen tot de Dierkunde* **63**: 193–220.
- Faegri K, van der Pijl L.** 1966. *The principles of pollination ecology*. Oxford: Pergamon Press.
- Fenster CB, Armbruster WS, Wilson P, Dudash MR, Thomson JD.** 2004. Pollination syndromes and floral specialization. *Annual Review of Ecology and Systematics* **35**: 375–403.
- Gijbels P, Van den Ende W, Honnay O.** 2014. Landscape scale variation in nectar amino acid and sugar composition in a Lepidoptera pollinated orchid species and its relation with fruit set. *Journal of Ecology* **102**: 136–144.
- Gómez JM, Zamora R.** 1999. Generalization vs. specialization in the pollination system of *Hormathophylla spinosa* (Cruciferae). *Ecology* **80**: 796–805.
- Gómez JM, Zamora R.** 2006. Ecological factors that promote the evolution of generalization in pollination systems. In: Waser NM, Ollerton J, eds. *Plant-pollinator interactions. From specialization to generalization*. Chicago: University of Chicago Press, 145–166.
- Gómez JM, Abdelaziz M, Camacho JPM, Muñoz-Pajares AJ, Perfectti F.** 2009a. Local adaptation and maladaptation to pollinators in a generalist geographic mosaic. *Ecology Letters* **12**: 672–682.
- Gómez JM, Perfectti F, Bosch J, Camacho JPM.** 2009b. A geographic selection mosaic in a generalized plant–pollinator–herbivore system. *Ecological Monographs* **79**: 245–263.
- Gómez JM, Munoz-Pajares AJ, Abdelaziz M, Lorite J, Perfectti F.** 2014. Evolution of pollination niches and floral divergence in the generalist plant *Erysimum mediohispanicum*. *Annals of Botany* **113**: 237–249.
- Gómez JM, Perfectti F, Abdelaziz M, Lorite J, Muñoz-Pajares AJ, Valverde J.** 2015. Evolution of pollination niches in a generalist plant clade. *New Phytologist* **205**: 440–453.
- González-Teuber M, Heil M.** 2009. Nectar chemistry is tailored for both attraction of mutualists and protection from exploiters. *Plant Signaling and Behavior* **4**: 809–813.
- Grant V.** 1949. Pollination systems as isolating mechanisms in angiosperms. *Evolution* **3**: 82–97.
- Herrera CM.** 1988. Variation in mutualisms: the spatio-temporal mosaic of pollinator assemblage. *Biological Journal of the Linnean Society* **35**: 95–125.
- Herrera CM.** 1989. Pollinator abundance, morphology, and flower visitation rate: analysis of the “quantity” component in a plant–pollinator system. *Oecologia* **80**: 241–248.
- Herrera CM.** 1996. Floral traits and plant adaptation to insect pollinators: a devil’s advocate approach. In: Lloyd DG, Barrett SC, eds. *Floral biology. Studies on floral evolution in animal-pollinated plants*. New York: Chapman and Hall, 65–87.
- Herrera CM.** 2005. Plant generalization on pollinators: species property or local phenomenon? *American Journal of Botany* **92**: 13–20.
- Herrera CM, Castellanos MC, Medrano M.** 2006. Geographical context of floral evolution: towards an improved research programme in floral diversification. In: Harder LD, Barrett SCH, eds. *The ecology and evolution of flowers*. Oxford: Oxford University Press, 278–294.
- Johnson SD.** 2006. Pollinator-driven speciation in plants. In: Harder LD, Barrett SCH, eds. *The ecology and evolution of flowers*. Oxford: Oxford University Press, 295–310.
- Johnson SD.** 2010. The pollination niche and its role in the diversification and maintenance of the southern African flora. *Philosophical Transactions of the Royal Society B Biological Sciences* **365**: 499–516.
- Johnson SD, Steiner KE.** 2000. Generalization versus specialization in plant pollination systems. *Trends in Ecology and Evolution* **15**: 140–143.

- Johnson SD, Delph LF, Elderkin CL. 1995. The effect of petal-size manipulation on pollen removal, seed set, and insect-visitor behavior in *Campanula americana*. *Oecologia* **102**: 174–179.
- Jordano P. 1987. Patterns of mutualistic interactions in pollination and seed dispersal: connectance, dependence asymmetries, and coevolution. *American Naturalist* **129**: 657–677.
- Junker RR. 2016. Multifunctional and diverse floral scents mediate biotic interactions embedded in communities. In: Blande JD, Glinwood RT, eds. *Deciphering chemical language of plant communication. Signaling and communication in plants*. Heidelberg: Springer, 257–282.
- Junker RR, Keller A. 2015. Microhabitat heterogeneity across leaves and flower organs promotes bacterial diversity. *FEMS Microbiology Ecology* **91**: fiv097.
- Kaye TM, Kirkland M. 1994. *Population biology of Lomatium bradshawii*. II. Insect interactions, phenology and breeding system. USDI Bureau of Land Management (Eugene District), Oregon Department of Agriculture, Salem, Oregon.
- Knudsen JT, Ericsson R, Gershenzon J, Stahl B. 2006. Diversity and distribution of floral scent. *Botanical Review* **72**: 1.
- Knuth P. 1898. *Handbuch der Blütenbiologie, II Band, 1. Teil: Ranunculaceae bis Compositae*. Leipzig: Wilhelm Engelmann.
- Kuppler J, Höfers MK, Wiesmann L, Junker RR. 2016. Time-invariant differences between plant individuals in interactions with arthropods correlate with intraspecific variation in plant phenology, morphology and floral scent. *New Phytologist* **210**: 1357–1368.
- Lamborn E, Ollerton J. 2000. Experimental assessment of the functional morphology of inflorescences of *Daucus carota* (Apiaceae): testing the ‘fly catcher effect’. *Functional Ecology* **14**: 445–454.
- Lande R. 1976. Natural selection and random genetic drift in phenotypic evolution. *Evolution* **30**: 314–334.
- Lanza J, Smith GC, Sack S, Cash A. 1995. Variation in nectar volume and composition of *Impatiens capensis* at the individual, plant, and population levels. *Oecologia* **102**: 113–119.
- Lindsey AH. 1984. Reproductive biology of Apiaceae. 1. Floral visitors to *Thaspium* and *Zizia* and their importance in pollination. *American Journal of Botany* **71**: 375–387.
- Lindsey AH, Bell CR. 1985. Reproductive biology of Apiaceae. 2. Cryptic specialization and floral evolution in *Thaspium* and *Zizia*. *American Journal of Botany* **72**: 231–247.
- Mabberley DJ. 2008. *Mabberley's plant-book. A portable dictionary of plants, their classification and uses*, 3rd edn. Cambridge: Cambridge University Press.
- Niemirski R, Zych M. 2011. Fly pollination of dichogamous *Angelica sylvestris* (Apiaceae): how (functionally) specialized can a (morphologically) generalized plant be? *Plant Systematics and Evolution* **294**: 147–158.
- Van der Niet T, Johnson SD. 2012. Phylogenetic evidence for pollinator-driven diversification of angiosperms. *Trends in Ecology and Evolution* **27**: 353–361.
- Van der Niet T, Peakall R, Johnson SD. 2014a. Pollinator-driven ecological speciation in plants: new evidence and future perspectives. *Annals of Botany* **113**: 199–211.
- Van der Niet T, Pirie MD, Shuttleworth A, Johnson SD, Midgley JJ. 2014b. Do pollinator distributions underlie the evolution of pollination ecotypes in the Cape shrub *Erica plukenetii*? *Annals of Botany* **113**: 301–316.
- Ojala A. 1986. Variation of *Angelica archangelica* subsp. *archangelica* (Apiaceae) in northern Fennoscandia: 3. Interpopulational variation in reproductive and life-history characters. *Annales Botanici Fennici* **23**: 11–21.
- Olesen JN, Dupont YL, Ehlers BK, Hansen DM. 2007. The openness of a flower and its number of flower-visitor species. *Taxon* **56**: 729–736.
- Ollerton J. 1996. Reconciling ecological processes with phylogenetic patterns: the apparent paradox of plant-pollinator systems. *Journal of Ecology* **84**: 767–769.
- Ollerton J, Killick A, Lamborn E, Watts S, Whiston M. 2007. Multiple meanings and modes: on the many ways to be a generalist flower. *Taxon* **56**: 717–728.
- Padyšáková E, Bartoš M, Tropek R, Janeček Š. 2013. Generalization versus specialization in pollination systems: visitors, thieves, and pollinators of *Hypoestes aristata* (Acanthaceae). *Plos One* **8**: e59299.
- Pérez-Bañón C, Petanidou T, Marcos-García MÁ. 2007. Pollination in small islands by occasional visitors: the case of *Daucus carota* subsp. *commutatus* (Apiaceae) in the Columbretes archipelago, Spain. *Plant Ecology* **192**: 133–151.
- Perez-Barrales R, Arroyo J, Armbruster WS. 2007. Differences in pollinator faunas may generate geographic differences in floral morphology and integration in *Narcissus papyraceus* (Amaryllidaceae). *Oikos* **116**: 1904–1918.
- Pickering CM, Hill W. 2002. Reproductive ecology and the effect of altitude on sex ratios in the dioecious herb *Aciphylla simplicifolia* (Apiaceae). *Australian Journal of Botany* **50**: 289–300.
- Price MV, Waser NM, Irwin RE, Campbell DR, Brody AK. 2005. Temporal and spatial variation in pollination of a montane herb: a seven-year study. *Ecology* **86**: 2106–2116.
- Proctor M, Yeo P, Lack A. 1996. *The natural history of pollination*. London: Harper Collins.
- R Development Core Team. 2011. *R: A Language and Environment for Statistical Computing*. Vienna: R Foundation for Statistical Computing.
- Reverté S, Retana J, Gómez JM, Bosch J. 2016. Pollinators show flower colour preferences but flowers with similar colours do not attract similar pollinators. *Annals of Botany* **118**: 249–257.
- Roy R, Schmitt AJ, Thomas JB, Carter CJ. 2017. Nectar biology: from molecules to ecosystems. *Plant Science* **262**: 148–164.
- Schemske DW, Horvitz CC. 1984. Variation among floral visitors in pollination ability: a precondition for mutualism specialization. *Science* **225**: 519–521.
- Schlessman MA, Barrie FR. 2004. Protogyny in Apiaceae, subfamily Apioideae: systematic and geographic distributions, associated traits, and evolutionary hypotheses. *South African Journal of Botany* **70**: 475–487.
- Schlessman MA, Underwood N, Watkins T, Graceffa LM, Cordray D. 2004. Functions of staminate flowers in andromonoecious *Pseudocymopterus montanus* (Apiaceae, Apioideae). *Plant Species Biology* **19**: 1–12.
- Stpicyńska M, Nepi M, Zych M. 2015. Nectaries and male-biased nectar production in protandrous flowers of a perennial umbellifer *Angelica sylvestris* L. (Apiaceae). *Plant Systematics and Evolution* **301**: 1099–1113.
- Terrab A, Garcia-Castano JL, Romero JM, Berjano R, De Vega C, Talavera S. 2007. Analysis of amino acids in nectar from *Silene colorata* Poirlet (Caryophyllaceae). *Botanical Journal of the Linnean Society* **155**: 49–56.
- Teulier L, Weber JM, Crevier J, Darveau CA. 2016. Proline as a fuel for insect flight: enhancing carbohydrate oxidation in hymenopterans. *Proceedings of the Royal Society B Biological Sciences* **283**: 8.
- Thompson JN. 2005. *The geographic mosaic of coevolution*. Chicago: University of Chicago Press.
- Tollsten L, Øvstedal DO. 1994. Differentiation in floral scent chemistry among populations of *Conopodium majus* (Apiaceae). *Nordic Journal of Botany* **14**: 361–367.
- Tollsten L, Knudsen JT, Bergström LG. 1994. Floral scent in generalistic *Angelica* (Apiaceae) – an adaptive character? *Biochemical Systematics and Ecology* **22**: 161–169.
- Waser NM, Chittka L, Price MV, Williams NM, Ollerton J. 1996. Generalization in pollination systems, and why it matters. *Ecology* **77**: 1043–1060.
- Webb CJ. 1981. Andromonoecism, protandry, and sexual selection in Umbelliferae. *New Zealand Journal of Botany* **19**: 335–338.
- Willmer P. 2011. *Pollination and floral ecology*. Princeton: Princeton University Press.
- Wilson P, Thomson JD. 1996. How do flowers diverge? In: Lloyd DG, Barrett SCH, eds. *Floral biology: studies on floral evolution in animal-pollinated plants*. New York: Chapman & Hall, 88–111.
- Yamada T, Kodama K, Maki M. 2014. Floral morphology and pollinator fauna characteristics of island and mainland populations of *Ligustrum ovalifolium* (Oleaceae). *Botanical Journal of the Linnean Society* **174**: 489–501.
- Zamora R. 2000. Functional equivalence in plant-animal interactions: ecological and evolutionary consequences. *Oikos* **88**: 442–447.
- Zych M. 2002. Pollination biology of *Heracleum sphondylium* L. (Apiaceae). The advantages of being white and compact. *Acta Societatis Botanicorum Poloniae* **71**: 163–170.
- Zych M. 2007. On flower visitors and true pollinators: the case of protandrous *Heracleum sphondylium* L. (Apiaceae). *Plant Systematics and Evolution* **263**: 159–179.
- Zych M, Niemczyk P, Niemirski R. 2007. Umbellifers as potential keystone species in restoration projects. *Acta Agrobotanica* **60**: 45–49.
- Zych M, Michalska B, Krasicka-Korczyńska E. 2014. Myophily in the critically endangered umbelliferous plant *Ostericum palustre* Besser (Apiaceae). *Plant Systematics and Evolution* **300**: 187–196.
